# Supplementary material for: Comparison of the Clinical Implications among Five Different Nutritional Indices in Patients with Lupus Nephritis
Source: PubMed Central journal article supplement (PMC6682980; doi:10.3390/nu11071456), 2019-06-27
Supplement: nutrients-11-01456-s001.pdf [file nutrients-11-01456-s001.pdf]

**Supplementary Table S1. Calculation of the CONUT score**

| Laboratory parameters                      | None   | Light     | Moderate  | Severe |
|--------------------------------------------|--------|-----------|-----------|--------|
| Serum albumin (g/dL)                       | ≥ 3.50 | 3.00-3.49 | 2.50-2.99 | <2.50  |
| Score                                      | 0      | 2         | 4         | 6      |
| Total lymphocyte count (/mm <sup>3</sup> ) | ≥ 1600 | 1200-1599 | 800-1199  | <800   |
| Score                                      | 0      | 1         | 2         | 3      |
| Total cholesterol (mg/dL)                  | ≥ 180  | 140-179   | 100-139   | <100   |
| Score                                      | 0      | 1         | 2         | 3      |

CONUT score= Serum albumin score + total lymphocyte count score + total cholesterol score

CONUT, Controlling nutritional status.

**Supplementary Table S2. Comparison of medications administered in patients with and without end stage renal failure during the follow-up**

| Variables                 | Total (n=207) | Patients with ESRF (n=20) | Patients without ESRF (n=187) | p-value |
|---------------------------|---------------|---------------------------|-------------------------------|---------|
| <b>Medications, n (%)</b> |               |                           |                               |         |
| Glucocorticoids           | 205 (99.0)    | 20 (100.0)                | 185 (98.9)                    | 0.999   |
| Hydroxychloroquine        | 112 (54.1)    | 7 (35.0)                  | 105 (56.1)                    | 0.072   |
| Cyclophosphamide          | 67 (32.4)     | 8 (40.0)                  | 59 (31.6)                     | 0.444   |
| Mycophenolate mofetil     | 161 (77.8)    | 13 (65.0)                 | 148 (79.1)                    | 0.149   |
| Azathioprine              | 28 (13.5)     | 3 (15.0)                  | 25 (13.4)                     | 0.739   |
| Tacrolimus                | 50 (24.2)     | 8 (25.0)                  | 42 (22.5)                     | 0.082   |
| Cyclosporine              | 10 (4.8)      | 1 (5.0)                   | 9 (4.8)                       | 0.999   |

Values are expressed as n (%).

ESRF, End-stage renal failure.

**Supplementary Table S3. Correlation analysis between nutritional indices at lupus nephritis diagnosis**

| Variables   | CONUT score     | PNI             | NRI            | NLR            | BMI |
|-------------|-----------------|-----------------|----------------|----------------|-----|
| CONUT score | n/a             |                 |                |                |     |
| PNI         | -0.780 (<0.001) | n/a             | n/a            | n/a            | n/a |
| NRI         | -0.199 (0.004)  | 0.165 (0.018)   | n/a            | n/a            | n/a |
| NLR         | 0.304 (<0.001)  | -0.272 (<0.001) | -0.105 (0.132) | n/a            | n/a |
| BMI         | -0.069 (0.326)  | -0.024 (0.731)  | 0.861 (<0.001) | -0.054 (0.442) | n/a |

Data are shown in correlation coefficient followed by p-value in parentheses.

CONUT, Controlling nutritional status; PNI, Prognostic nutritional index; NRI, Nutritional risk index; NLR, Neutrophil to lymphocyte ratio; BMI, Body mass index.
